# Self-Assembly of Tunable Intrinsically Disordered Peptide Amphiphiles

Tamara Ehm,<sup>†,‡,¶,§</sup> Hila Shinar,<sup>†,¶,§</sup> Guy Jacoby,<sup>†,¶,§</sup> Sagi Meir,<sup>†,¶,§</sup> Gil Koren,<sup>†,¶,§</sup>  
Merav Segal Asher,<sup>||,§</sup> Joanna Korpanty,<sup>⊥</sup> Matthew P. Thompson,<sup>⊥</sup> Nathan C.  
Gianneschi,<sup>⊥,#</sup> Michael M. Kozlov,<sup>@,¶</sup> Salome Emma Azoulay-Ginsburg,<sup>||</sup> Roey  
J. Amir,<sup>\*,||,¶,§,△</sup> Joachim O. Rädler,<sup>\*,‡</sup> and Roy Beck<sup>\*,†,¶,§</sup>

<sup>†</sup>*Raymond & Beverly Sackler School of Physics & Astronomy, Tel Aviv University, Tel Aviv 6997801, Israel*

<sup>‡</sup>*Faculty of Physics and Center for NanoScience, Ludwig-Maximilians-Universität, München D-80539, Germany*

<sup>¶</sup>*The Center for Physics & Chemistry of Living Systems, Tel Aviv University, Tel Aviv 6997801, Israel*

<sup>§</sup>*The Center for NanoTechnology & NanoScience, Tel Aviv University, Tel Aviv 6997801, Israel*

<sup>||</sup>*Raymond & Beverly Sackler School of Chemistry, Tel Aviv University, Tel Aviv 6997801, Israel*

<sup>⊥</sup>*Department of Chemistry, International Institute for Nanotechnology, Chemistry of Life Processes Institute, Simpson Querrey Institute, Northwestern University, Evanston, Illinois 60208, United States*

<sup>#</sup>*Department of Materials Science & Engineering, Department of Biomedical Engineering and Department of Pharmacology, Northwestern University, Evanston, Illinois 60208, United States*

<sup>@</sup>*Raymond & Beverly Sackler School of Medicine, Tel Aviv University, Tel Aviv 6997801, Israel*

<sup>△</sup>*The ADAMA Center for Novel Delivery Systems in Crop Protection, Tel Aviv University, Tel Aviv 6997801, Israel*

## Abstract

Intrinsically disordered peptide amphiphiles (IDPAs) present a novel class of synthetic conjugates that consist of short hydrophilic polypeptides anchored to hydrocarbon chains. These hybrid polymer-lipid block constructs spontaneously self-assemble into dispersed nanoscopic aggregates or ordered mesophases in aqueous solution due to hydrophobic interactions.

Yet, the possible sequence variations and their influence on the self-assembly structures is vast and have hardly been explored.

Here, we measure the nanoscopic self-assembled structures of four IDPA systems that differ by their amino acid sequence. We show that permutations in the charge pattern along the sequence remarkably alter the headgroup conformation and consequently alters the pH-triggered phase transitions between spherical, cylindrical micelles and hexagonal condensed phases. We demonstrate that even a single amino acid mutation is sufficient to tune structural transitions in the condensed IDPA mesophases, while peptide conformations remain unfolded and disordered. Furthermore, alteration of the peptide sequence can render IDPAs to become susceptible to enzymatic cleavage and induces enzymatically activated phase transitions.

These results hold great potential for embedding multiple functionalities into lipid nanoparticle delivery systems by incorporating IDPAs with desired properties.

## Keywords

Self-assembly, SAXS, Intrinsically Disordered Peptide Amphiphiles

## Introduction

Self-assembly of amphiphiles that combine hydrophilic and hydrophobic molecular moieties plays an omnipresent role both in natural and synthetic systems. In the biological world, lipid self-organization lies at the basis of cell membrane integrity, transport vehicles, and

26 reaction vessels with precisely controlled size and functionality. In pharmacology, synthetic  
27 amphiphiles, in addition to natural lipids, are used to form nanoscopic carriers for encapsu-  
28 lating drugs.<sup>1</sup> Following rational design principles, control of size and stability of assemblies  
29 is achieved most prominently by using polyethylene glycol (PEG)-lipid conjugates. These  
30 strategies result in highly efficient formulations such as lipid nanoparticles that serve as  
31 RNA-based vaccine carriers against SARS-CoV-2,<sup>2</sup> or other cargos or drugs.<sup>3-9</sup> In order  
32 to advance functionality, nanocarriers composed of stimuli-responsive (e.g., enzymatic, pH,  
33 temperature) amphiphilic systems<sup>10-16</sup> are studied, as they can potentially reduce the side  
34 effect of drugs by targeted release in tissues.

35 Amphiphiles can self-assemble into various mesophases in solution. Their mesoscopic  
36 morphology is, to a first approximation, determined by the volumetric ratio of the effective  
37 hydrophilic head group to the hydrophobic tail, as described by the so-called packing pa-  
38 rameter.<sup>17</sup> Here, the hydrophobic domain is composed of one or two fatty acid-based chains,  
39 as we previously demonstrated.<sup>18</sup> In recent works, polypeptide chains have been conjugated  
40 to a hydrophobic domain to create peptide amphiphiles.<sup>19-22</sup> In these studies, the polypep-  
41 tides exhibited folded conformations and formed well-controlled nanoscale assemblies, such  
42 as long nanorods, that proved capable of encapsulating and releasing small molecules.<sup>23,24</sup>  
43 The folded hydrophilic headgroup can lead to specific and relatively rigid structures that spe-  
44 cific enzymes can recognize. Thus, these structures are potentially beneficial in applications  
45 where specific ligand-receptor binding is required.<sup>25,26</sup>

46 As in many other cases in biology, liquid-like structures dominated by weak and reversible  
47 interactions can be leveraged for novel biomedical applications. Indeed, and in contrast to  
48 the central dogma of proteins' folding, about half of the proteome contain proteins, and  
49 large domains that do not fold into rigid secondary or tertiary structures.<sup>27-29</sup> These un-  
50 folded, intrinsically disordered proteins (IDPs) provide a significant functional advantage,  
51 enabling them to interact weakly with a broad range of binding partners, including them-  
52 selves.<sup>30,31</sup> Prominent examples of IDPs with weak interactions (i.e., on the order of thermal

53 energy) include IDPs occurring in liquid-liquid phase separations<sup>32</sup> or forming selective fil-  
54 ters in nucleoporin complexes.<sup>33</sup> Other examples of long disordered domains are the carboxy  
55 tails of intermediate filaments proteins. These proteins retain their disordered nature, even  
56 when constrained at high-density<sup>31,34,35</sup> and are responsible for fine-tuning the mechanical  
57 cytoskeleton behavior.<sup>36–40</sup>

58 Previous works showed that both the sequence composition and the fraction of charged  
59 amino-acids play essential roles in the properties of a protein’s unfolded ensemble.<sup>41,42</sup> For  
60 example, molecular dynamic simulations suggest that sequence composition and patterning  
61 are well reflected in the global conformational variables (e.g., the radius of gyration and the  
62 hydrodynamic radius), but end-to-end distance and dynamics are highly sequence-specific.<sup>43</sup>  
63 Such analysis is suitable for comparing IDPs of different lengths.<sup>29,44</sup> Moreover, it was demon-  
64 strated that the total net charge is inadequate as a descriptor of sequence–ensemble relation-  
65 ships for many IDPs. Instead, sequence-specific distributions of oppositely charged residues  
66 are synergistic determinants of conformational properties of polyampholytic IDPs.<sup>45</sup>

67 Sequence-encoded conformational properties can be extracted by calculating the charge  
68 patterning parameter ( $0 \leq \kappa \leq 1$ ) and the fraction of charged residues ( $FCR$ ).<sup>45</sup> Low values  
69 of  $\kappa$  point to sequences where intrachain electrostatic repulsions and attractions are bal-  
70 anced. In contrast, high  $\kappa$  sequences show a preference for hairpin-like conformations caused  
71 by long-range electrostatic attractions induced by conformational fluctuations.<sup>45</sup> Other stud-  
72 ies presented coarse-grain models that identify short-range electrostatic attractive domains  
73 between IDPs.<sup>36,37,46</sup> Altogether, IDPs present an intriguing, unexplored territory that com-  
74 bines the structural plasticity of weakly interacting polymers with the specificity of the  
75 amino-acid sequence.

76 In this context, intrinsically disordered peptide amphiphiles (IDPAs) are of great interest  
77 as they combine building blocks from natural lipids and proteins.<sup>47–49</sup> IDPAs are composed  
78 of intrinsically disordered peptides conjugated to hydrocarbon chains, creating amphiphiles  
79 with polymeric headgroups and hydrophobic anchors that remain compatible with natural

80 lipid membranes. Though IDPAs hold promise for fine-tuned nanoscopic self-assembly, the  
81 sequence space of even a 20 amino-acid short polypeptide is extremely large and hardly  
82 explored.

83 Here, we present an approach to verify that structural transitions in IDPA assemblies  
84 depend on the peptide sequence, even though the head group conformation is disordered.  
85 We designed IDPAs with a peptide sequence inspired by neurofilament low chain protein  
86 and conjugated the sequence to a single or double hydrocarbon tail to compare peptides  
87 composed of the same amino acids but in different sequence order. Using small angle X-ray  
88 scattering (SAXS) and cryogenic transmission electron microscopy (cryo-TEM), we analyzed  
89 the nanoscopic structural phase transitions as a function of pH and buffer salinity. We show  
90 that the phase transitions are controlled by the hydrophobic domain and the charge pattern  
91 of the peptide sequence that may induce hairpin-like conformations. Surprisingly, although  
92 the amphiphiles remain disordered, the mesoscopic structures exhibit low polydispersity.  
93 Structural phase transitions in mesoscopic order are sensitive to the mutation of a single  
94 amino acid in the polypeptide head group. Finally, we demonstrate that incorporating  
95 suitable motifs renders IDPAs enzymatically cleavable. Ultimately, the reported sequence-  
96 dependent properties of IDPA mesophases could be exploited for the development of future  
97 drug carrier systems.

## 98 **Material and Methods**

### 99 **Synthesis and purification**

100 All peptides were synthesized via solid-phase synthesis and purchased from LifeTein (USA).  
101 Amino acids are conjugated from the C-terminus to the N-terminus while the peptide remains  
102 anchored to insoluble solid resin support. The process involves repeated coupling cycles,  
103 washing, deprotection, and washing. The hydrophobic domain has either single or double  
104 hydrocarbon chains. After adding the last amino acid and deprotection, the fatty acid

105 chain was conjugated to the deprotected amine. Double chain PDAs were prepared by  
106 conjugation of Fmoc-Lys(Fmoc)-OH, followed by cleavage of the two Fmoc protecting groups  
107 and conjugation of the two tails.

## 108 **Sample preparation**

109 The IDPA or peptide powder was first fluidized in purified water (Milli-Q) at twice the  
110 desired concentration. The solution was then titrated with 1M NaOH to a pH where the  
111 solution became more homogeneous (preferably a pH where the IDPAs are soluble in water).  
112 Titration was monitored using a pH probe. Following titration, 50  $\mu$ l of the solution was  
113 combined with 50  $\mu$ l of 2X buffer of choice to achieve a pH in the vicinity of the desired one.  
114 The 2X buffers Acetic Acid (pH 3-4.5), 2-(N-Morpholino)ethansulfonsäure (MES, pH 5-6.5),  
115 and 3-(N-morpholino) propane sulfonic acid (MOPS, pH 7-7.5), were prepared at 200 mM,  
116 to achieve final buffer molarity of 100 mM after mixing with IDPA or peptide solution 1:1  
117 (vol:vol).

## 118 **CD**

119 Circular dichroism (CD) measurements were performed using a commercially available CD  
120 spectrometer (Applied Photophysics Chirascan). IDPs were added to a glass cuvette with a  
121 1mm path length. The peptides were mixed with phosphate buffer to achieve a concentration  
122 of 0.1  $\frac{mg}{ml}$ . The measurements were performed with phosphate buffer because the buffers used  
123 for the X-ray scattering experiments (mainly MOPS and MES) have high absorption at the  
124 relevant CD wavelengths. The wavelength range of 190-260 nm was measured in 1-nm steps  
125 with 0.5 seconds per point. Three measurements were performed for each sample, and the  
126 mean value was calculated.

## 127 Computational methods for disorder analysis

128 Disorder can also be analyzed computationally. IUPred2<sup>50</sup> uses an energy estimation method.  
129 The principal lies in a  $20 \times 20$  energy predictor matrix  $P_{ij}$  that shows the statistical potential  
130 for the 20 amino acid to connect with each other in a globular protein. :

$$e_i^k = \sum_{j=1}^{20} P_{ij} c_j^k, \quad (1)$$

131 where  $e_i^k$  is the energy of the residue in position  $k$  of type  $i$ . The equation calculates for each  
132 position  $k$  the sum of for all elements  $j$  in the amino acid composition vector  $c_j$  for all types  $i$ .  
133 The parameters are optimized to minimize the difference between energies estimated from the  
134 amino acid composition vector and the energies calculated from the known structure for each  
135 residue in the dataset of proteins. As IUPred2, ANCHOR2<sup>50</sup> also uses an energy estimation  
136 method and adds two more terms to the energy estimation: the interaction of the residues  
137 with the globular protein and the local environment. Thus, ANCHOR2 combines the disordering  
138 tendency calculated by Iurpred with the sensitivity to the environment of the protein  
139 and can predict if a specific region is disordered in isolation but can undergo disorder-to-order  
140 transition upon binding- without even knowing the possible binding partners. Netsurf 2.0<sup>51</sup>  
141 is a sequence-based method and uses an architecture composed of convolutional and long  
142 short-term memory neural networks trained on solved protein structures to predict disorder.

## 143 Cryo-TEM

144 Cryogenic TEM (cryo-TEM) specimens were prepared using an FEI Vitrobot by blotting in  
145 95% humidity and subsequently plunging lacey carbon grids into liquid ethane. Images were  
146 taken for cryo-TEM using a JEOL 1230 transmission electron microscope operating at 120  
147 keV equipped with a Gatan camera.



## 148 **FRET**

149 Fluorescence spectra of IDPAs were measured using a Cary Eclipse fluorescence spectrophoto-  
150 tometer (Agilent Technologies, Santa Clara, CA). Measurements were done in a 1 cm quartz  
151 cuvette at 10  $\mu$ M concentrations in 100 mM buffer at 25°. Excitation spectra of IDP and  
152 IDPA included donor and acceptor (DA) spectra and acceptor only (AO) spectra. The sam-  
153 ples were excited over the range of 250–330 nm (bandwidth 2.5 nm), and the emission was set  
154 to 350 nm (bandwidth 20.0 nm). The excitation spectra were normalized at 290–295 nm (no  
155 Tyr absorption). The level of energy transfer,  $E$ , between the donor and the acceptor, Y and  
156 W, respectively, was determined by the difference in integrated intensity at 270–285 nm and  
157 using YW dipeptide as a reference for 100% energy transfer. Buffer and background signals  
158 were routinely measured and subtracted. Distance,  $r$ , was calculate using  $E = R_0/(R_0 + r)$   
159 while the Forster radius,  $R_0$ , was set as 15 Å.

## 160 **Small angle X-ray scattering (SAXS)**

161 All samples for SAXS were prepared at a final concentration of 5mg/ml, which is an order of  
162 magnitude higher than the typical micro-molar CMC of 5 $\mu$ M, reported for similar peptide  
163 amphiphiles.<sup>47,48,52,53</sup> For solubilizing conditions (above the transition pH, generally above  
164 pH 6), samples were measured at three synchrotron facilities: Beamline B21, Diamond Light  
165 Source, beamline SWING, SOLEIL synchrotron facility, Paris, France, and DESY, Ham-  
166 burg, Germany. For phase-separating samples that display sediment (below the transition  
167 pH, generally pH 3–5.5), measurements were performed using an in-house X-ray scattering  
168 system, with a Genix3D (Xenocs) low divergence Cu  $K_\alpha$  radiation source (wavelength of  
169  $\lambda = 1.54$  Å) with a Pilatus 300K (Dectris) detector, as well as beamline I22 at Diamond  
170 Light Source. Samples were measured inside 1.5 mm quartz capillaries (Hilgenberg). All 2D  
171 measurements were radially integrated using SAXSi<sup>46</sup> to get 1D Intensity- scattering vector  
172  $q$  data sets.

## 173 Singular Value Decomposition (SVD)

174 In SVD, a minimum number of singular vectors represents the entire data set. Thus, these  
175 independent curves can represent the entire data set by their linear combinations:

$$A = U * S * V^T, \quad (2)$$

176 where  $U$  yields a set of left singular vectors, i.e., orthonormal basic curves  $U(k)(si)$ , that  
177 spans the range of matrix  $A$ . In contrast, the diagonal of  $S$  contains their associated singular  
178 values in descending order. For our scattering curves, the residuals are calculated via:

$$R_k = \frac{1}{nm} \sum_{q_i=1}^n \sum_{p_j=1}^m R_{k,q_i,p_j}^2, \quad (3)$$

179 where  $m$  is the size of the scattering vector  $q$  and  $n$  are the number of pH steps, are plotted as  
180 a function of the number of singular vector components ( $k$ ) that were chosen to reconstruct  
181 the data matrix.  $R_{k,q_i,p_j}$  is defined by  $R_{k,q_i,p_j} = \frac{D_{q_i,p_j} - D_{kq_i,p_j}}{\sigma_{q_i,p_j}}$ , where  $D$  is the data matrix, in  
182 which each column represents a one dimensional scattering curve,  $I(q, p)$  at every pH step  
183  $p$ .  $D_k$  is the reconstructed data matrix using  $k$  singular orthonormal vectors, and each term  
184  $(q_i, p_j)$  in the matrix  $\sigma$  corresponds to the measured standard error for the corresponding  
185 term in  $D$ .

## 186 Results

### 187 IDPA Primary Structure

188 In the presented study, all IDPs are directly conjugated to fatty acids of various lengths to  
189 create the amphiphilic IDPAs. This study used various standard linear fatty acid chains with  
190 12 (Lauric acid), 14 (Myristic acid), 16 (Palmitic acid), and 18 (Stearic acid) carbons (table  
191 1 for crucial parameters of IDPAs and Fig. 1 for chemical structures). The IDPAs were

192 synthesized using an automated solid-phase synthesizer. Thus, the molecular architectures  
 193 are highly tunable, allowing us to study various hydrophobic and hydrophilic domains in a  
 194 controlled manner. The peptide sequences are 18 amino acids long, containing protonable  
 195 residues and hydrophilic amino acids (Supplementary Fig. S.1).

Table 1: **Key paramteres and notation for IDPAs used in this paper.** Blue colored letters stand for anionic amino acids, pink colored ones for cationic amino acids. Upper case number in IDPA name is the sequence number and lower case numbers are the number of tails in this molecule.

| Name                               | Sequence                                                                                 | Total MW (Da)<br>and hydrocarbons | isoelectric point |
|------------------------------------|------------------------------------------------------------------------------------------|-----------------------------------|-------------------|
| IDPA <sup>1</sup> <sub>2×12</sub>  | G <b>D</b> G <b>EE</b> GAS <b>RH</b> <b>E</b> Y <b>E</b> G <b>K</b> <b>E</b> A <b>E</b>  | 2442.69                           | 4.1               |
| IDPA <sup>1</sup> <sub>2×14</sub>  | G <b>D</b> G <b>EE</b> GAS <b>RH</b> <b>E</b> Y <b>E</b> G <b>K</b> <b>E</b> A <b>E</b>  | 2498.79                           | 4.1               |
| IDPA <sup>1</sup> <sub>2×16</sub>  | G <b>D</b> G <b>EE</b> GAS <b>RH</b> <b>E</b> Y <b>E</b> G <b>K</b> <b>E</b> A <b>E</b>  | 2554.89                           | 4.1               |
| IDPA <sup>1</sup> <sub>1×14</sub>  | G <b>D</b> G <b>EE</b> GAS <b>RH</b> <b>E</b> Y <b>E</b> G <b>K</b> <b>E</b> A <b>E</b>  | 2160.26                           | 4.1               |
| IDPA <sup>1</sup> <sub>1×16</sub>  | G <b>D</b> G <b>EE</b> GAS <b>RH</b> <b>E</b> Y <b>E</b> G <b>K</b> <b>E</b> A <b>E</b>  | 2188.31                           | 4.1               |
| IDPA <sup>1</sup> <sub>1×18</sub>  | G <b>D</b> G <b>EE</b> GAS <b>RH</b> <b>E</b> Y <b>E</b> G <b>K</b> <b>E</b> A <b>E</b>  | 2216.38                           | 4.1               |
| IDPA <sup>2</sup> <sub>2×12</sub>  | <b>DEEEEEEE</b> GGGASYGA <b>RHK</b>                                                      | 2442.69                           | 4.1               |
| IDPA <sup>3</sup> <sub>2×12</sub>  | G <b>D</b> G <b>EE</b> GAS <b>R</b> G <b>E</b> Y <b>E</b> G <b>K</b> <b>E</b> A <b>E</b> | 2362.60                           | 3.8               |
| IDPA <sup>4</sup> <sub>2×12</sub>  | WAGGASGPLGLAGY <b>DEE</b> <b>R</b> <b>E</b>                                              | 2427.81                           | 3.5               |
| IDPA <sup>4Δ</sup> <sub>2×12</sub> | WAGGASGPLG                                                                               | 1364.72                           | x                 |

196 IDPA<sup>1</sup><sub>2×12</sub>'s primary sequence (Table 1, Supplementary Fig. S.1) is inspired by the in-  
 197 trinsically disordered carboxy tail-domain of neurofilament-light (NF-L) protein found in the  
 198 cytoskeleton of nerve cells.<sup>35–37,54</sup> In previous research,<sup>47</sup> we introduced this IDP sequence  
 199 to create IDPAs where aromatic branchings units were used to cap the N-terminus of the  
 200 IDP sequence and allow the branching into two different types of architectures containing  
 201 either two or four hydrocarbon tails (2×12, 4×7). We showed that these IDPAs undergo  
 202 a sharp phase transition from low-dispersity micellar spheres to extremely elongated worm-  
 203 like micelles. Here, we present IDPAs that can be entirely prepared using conventional solid  
 204 phase peptide synthesis and allow us to study alternative molecular architectures in further  
 205 depth. Inspired by the biological sequence of the NF-L protein, we synthesized sequence  
 206 IDP<sup>1</sup> to various hydrocarbon tails. By slightly modifying this sequence we studied how the  
 207 interaction between the IDPs results in altered self-assembled structures once conjugated to

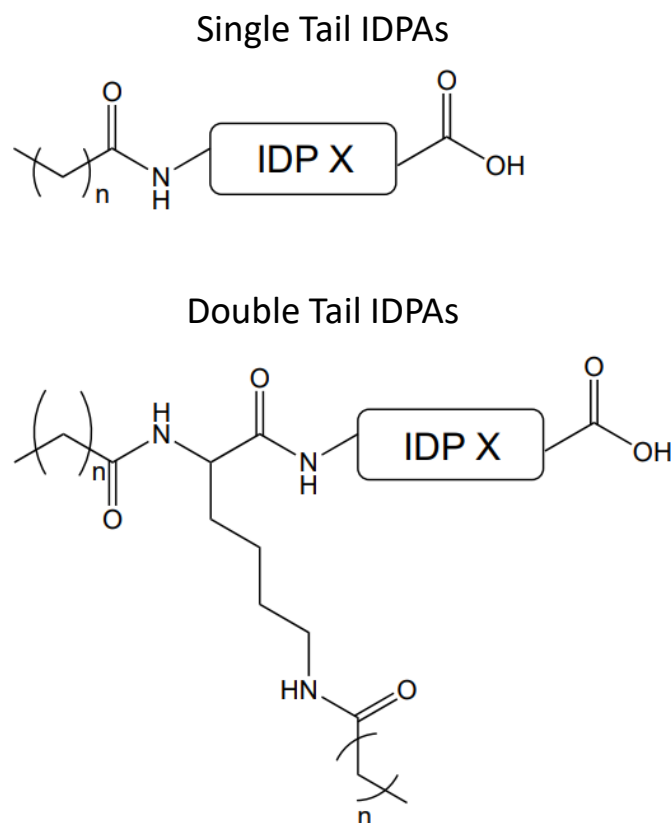

Figure 1: **Chemical structures for double and single tailed IDPAs.** For detailed chemical structures of IDP X see Supplementary Fig. S.1.

208 the hydrophobic core.

209 IDPA<sup>1</sup> series were synthesized with one or two aliphatic tails with three different tail  
210 lengths (1×14, 1×16, 1×18 and 2×12, 2×14, and 2×16) to investigate the influence of the  
211 hydrocarbon tail domain (Table 1, Supplementary Fig. S.1). In IDPA<sub>2×12</sub><sup>2</sup>, we segregated  
212 the negatively charged amino acids at the N-terminus, while the positive ones were placed  
213 at the C-terminus. Hence, both IDPA<sub>2×12</sub><sup>1</sup> and IDPA<sub>2×12</sub><sup>2</sup> have identical magnitudes of net  
214 charge per residue ( $N CPR \approx -0.278$ ) at physiological pH.

215 Notably, the two peptide sequences include 11 chargeable residues, allowing for the net  
216 charge of the peptide to vary significantly as a function of pH. Electrostatic interactions are  
217 thus expected to play a significant role in the amphiphiles' interactions and self-assembly.

218 For both IDPAs, the isoelectric point (pI) is calculated at pH 4.1. At higher pHs, and in  
219 particular above pH 5.5, there is a decrease in the net charge to negative values due to the  
220 complete deprotonation of the aspartic acid and glutamic acid residues (Fig. S.15).

221 To investigate the role of single amino acid mutation, we designed IDPA<sub>2×12</sub><sup>3</sup>, where we  
222 replaced the positively charged histidine at position 10 of IDPA<sub>2×12</sub><sup>1</sup> with neutral glycine (Sup-  
223 plementary Fig. S.1) which decreases the isoelectric point to 4.0. In previous experiments,  
224 we found that the hydrophilic domain (i.e., the disordered peptide) and its interactions con-  
225 trolled the complex aggregations at low pH and served to strengthen the interaction between  
226 worm-like micelles.<sup>47</sup> Here, we focus on the intermediate pH region where a single mutation  
227 can potentially fine-tune the phase transition point.

228 The peptides' degree of disorder was experimentally verified by measuring the circular  
229 dichroism (CD) spectrum (Supplementary Fig. S.3, see materials and methods). In ad-  
230 dition, the free peptides, IDP<sup>1</sup>, IDP<sup>2</sup> and IDP<sup>3</sup> display a high probability for disorder and  
231 the absence of regular secondary structure using Iupred/Anchor<sup>50</sup> and NetSurf 2.0<sup>51</sup> algo-  
232 rithm (Supplementary Fig. S.4, S.5, S.6, for analysis methods see material and methods).  
233 Interestingly, changing a single amino acid (His to Gly at position 10) from IDP<sup>1</sup> to IDP<sup>3</sup>  
234 changes the pH-dependent disorder. Specifically, in the vicinity of the isoelectric point, IDP<sup>3</sup>  
235 bioinformatiand CD analysis indicates a possible ordering and lack of disorder while IDP<sup>1</sup>  
236 and IDP<sup>2</sup> remain disordered throughout pH 2-10 (Supplementary Fig. S.4, S.5, S.6). Impor-  
237 tantly, all the bioinformatic analysis is conducted on peptide sequences alone, assuming it is  
238 a good proxy for the IDPAs that contain hydrophobic domains. We verified this assumption  
239 by measuring the frequency resonance energy transfer (FRET) of Tyr at position 14 and Trp  
240 at position 1 of IDP<sup>4</sup> and IDPA<sub>2×12</sub><sup>4</sup>. Here, we found no significant difference between the  
241 isolated peptide chain and when it is conjugated to the hydrophobic domain (Supplementary  
242 Fig. S.9, for FRET see material and methods).

## 243 **Amino-acids' charge patterning regulates the self-assembled micel-** 244 **lar structure at high pH**

245 The self-assembly of each IDPA was characterized by measuring the structural properties  
246 of pH-equilibrated samples using an in-house and synchrotron small-angle X-ray scattering  
247 (SAXS). SAXS allows direct evaluation in the solution of both the nanoscopic self-assembled  
248 structures and the mesophase symmetry (Supplementary Information).

249 We began our self-assembly investigation by comparing the structures for IDPA<sub>2×12</sub><sup>1</sup> and  
250 IDPA<sub>2×12</sub><sup>2</sup> at pH 6.5, both having 2×12 hydrocarbon chains. In such conditions, both IDPAs  
251 self-assemble into a dispersed micellar state but with shifted SAXS patterns (Fig. 2). We  
252 fit the data using a spherical core-shell scattering form factor (Supplementary equ. (2))  
253 and find that IDPA<sub>2×12</sub><sup>2</sup> shows a significantly smaller radius (IDPA<sub>2×12</sub><sup>1</sup>: 3.6nm, IDPA<sub>2×12</sub><sup>2</sup>:  
254 2.1nm). In addition, by extrapolating the form-factor to zero momentum transfer, we find  
255 the aggregation number to be about 40 and 20 for IDPA<sub>2×12</sub><sup>1</sup> and IDPA<sub>2×12</sub><sup>2</sup>, respectively.  
256 Given the similarity of the hydrophobic domain, the difference in radii thus originates from  
257 a smaller peptide layer (IDPA<sub>2×12</sub><sup>1</sup>: 2.2nm, IDPA<sub>2×12</sub><sup>2</sup>: 0.9nm, see Fig. 2a lower inset). Pair  
258 distance distribution function (PDDF) evaluation<sup>55</sup> confirms that the IDPA<sub>2×12</sub><sup>2</sup> micellar  
259 phase has a significant smaller radius of gyration (Fig. 2a, upper inset). Notably, the  
260 assembled structure at pH 6.5 is robust with low polydispersity, indicative of the sharp  
261 SAXS features.

## 262 **Phase transitions are influenced by charged amino-acid positioning**

263 Previous measurements<sup>47</sup> of an amphiphile with a similar peptide head group as IDPA<sub>2×12</sub><sup>1</sup>  
264 showed that its self-assembled structure is pH-dependent due to changes in the charged  
265 amino-acids. Here, we evaluate how charge patterning can tune the pH-dependent phase  
266 transitions for IDPA<sub>2×12</sub><sup>1</sup> and IDPA<sub>2×12</sub><sup>2</sup> using SAXS, turbidity measurements, and cryogenic  
267 transmission electron microscopy (cryo-TEM). IDPA<sub>2×12</sub><sup>1</sup> and IDPA<sub>2×12</sub><sup>1</sup> are insoluble close

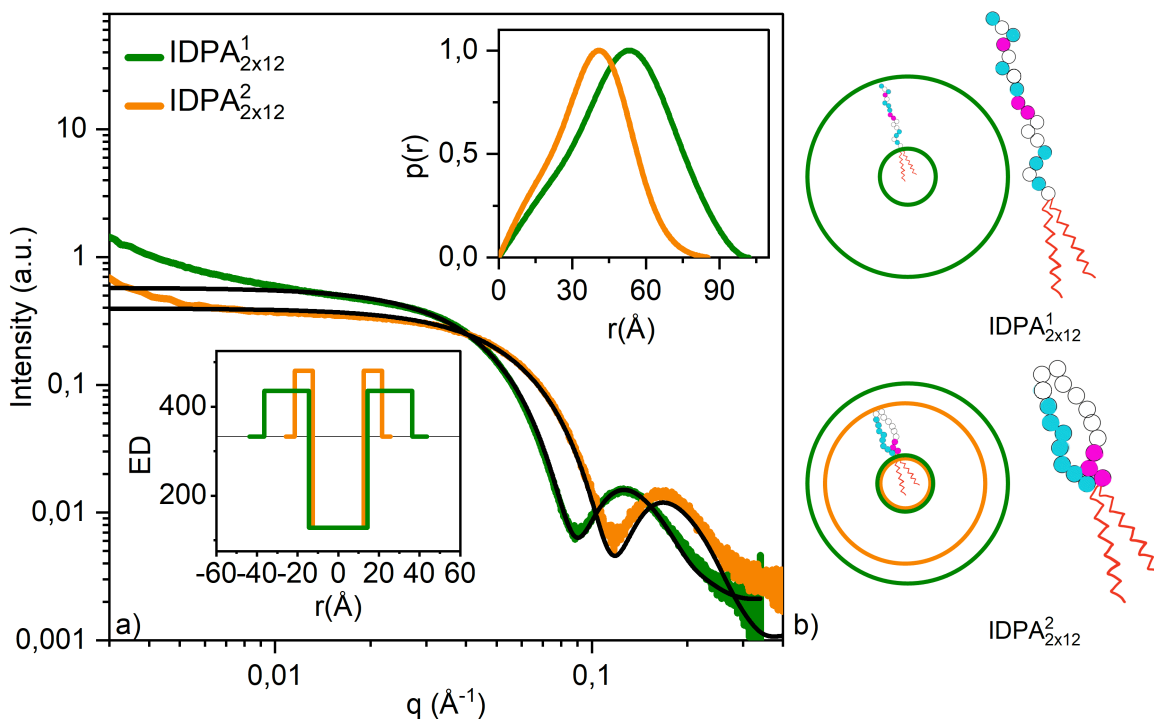

Figure 2: **IDP head conformation as a function of sequence.** a) SAXS profiles show smaller radii for IDPA $^1_{2 \times 12}$  (green) than IDPA $^2_{2 \times 12}$  (orange) at  $\text{pH} = 6.35 \pm 0.5$ . Micellar core-shell form factor fits are shown in black line with parameters detailed in Supplementary table S.1. Lower inset: Electron density (ED) profile used in the fit. Upper inset: radius of gyration results of PDDF ( $q$ -range for fit: IDPA $^1_{2 \times 12}$ :  $0.02\text{-}0.22 \text{ \AA}^{-1}$ , IDPA $^2_{2 \times 12}$ :  $0.02\text{-}0.24 \text{ \AA}^{-1}$ ). b) Representation of micellar sphere with IDPA $^1_{2 \times 12}$  (green) and IDPA 2 (orange) with significantly different sizes of IDP layers and illustration of backfolding in IDPA $^2_{2 \times 12}$  (lower cartoon) in comparison to IDPA $^1_{2 \times 12}$  (upper cartoon). Pink circles indicate cationic, blue anionic, and white – neutral amino acids.

268 to the isoelectric point (pI). This indicates that peptide-peptide interactions are favored  
 269 over peptide-water interactions.<sup>56,57</sup> Away from the pI, the IDPAs become soluble and form  
 270 monodisperse nanoparticles in the solution. These nanoparticles can be identified as spherical  
 271 and/or cylindrical micelles using cryo-TEM and turbidity measurements (Fig. 3). Further-  
 272 more, SAXS data analysis and cryo-TEM direct imaging reveal that micellar rods collapse  
 273 into a condensed phase in the vicinity of the pI (Fig. 3). For IDPA $^1_{2 \times 12}$ , the SAXS data  
 274 points towards a hexagonal phase (Fig. 3). This transition from worm-like monodisperse  
 275 micelles to hexagonal packed was also studied by turbidity measurements showing a clear  
 276 optical difference between the condensed and dispersed phase. Specifically, while IDPA $^1_{2 \times 12}$

277 transitions in a relatively small pH interval (pH 4.2-4.6), IDPA<sub>2×12</sub><sup>1</sup> shows a significantly  
 278 wider range for the transition (pH 4.2-6.5).

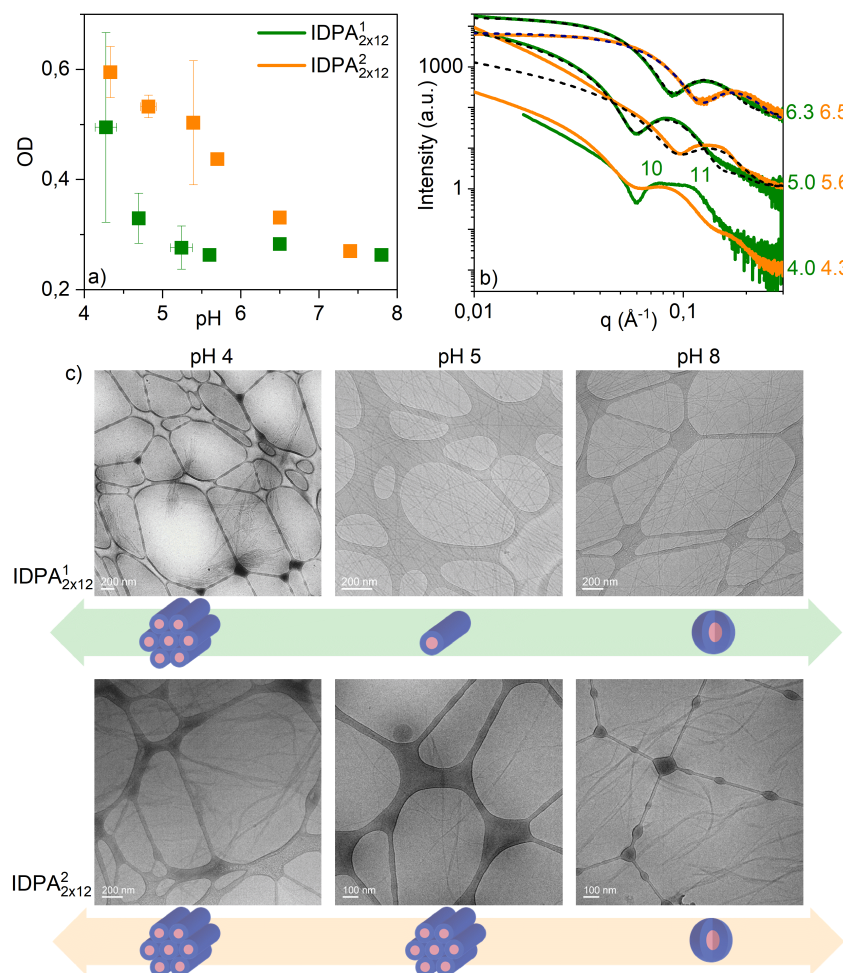

Figure 3: **pH-dependent condensation of mesophases for IDPA<sub>2×12</sub><sup>1</sup> and IDPA<sub>2×12</sub><sup>2</sup> - from bulk to dispersed phase** a) Absorbance measurement shows high absorbance at the vicinity of the isoelectric point at pH 4.1 , IDPA<sub>2×12</sub><sup>1</sup> shows a significantly milder slope than IDPA<sub>2×12</sub><sup>2</sup> when transitions between the two states b) SAXS scattering for IDPA<sub>2×12</sub><sup>1</sup> (green) and IDPA<sub>2×12</sub><sup>2</sup> (orange) at various pHs. Dotted lines show spherical/worm-like core-shell form factors. IDPA<sub>2×12</sub><sup>1</sup> at pH 4 shows humps that point towards a hexagonal phase. c) CryoTEM pictures for IDPA<sub>2×12</sub><sup>1</sup> showing phase transition from spherical to worm-like micelles at pH 5. Aggregation of worm-like monodisperse micelles at the vicinity of the isoelectric point at pH 4.1.



279 **Both peptide sequence and hydrocarbon chains length tune the spherical to**  
280 **rod-like micelle transition**

281 The balance between the architectures of the hydrophilic and hydrophobic domains plays  
282 a critical role in the self-assembly and phase transition of amphiphiles.<sup>14</sup> Previously, we  
283 showed that hydrophobic dendritic domains conjugated to the peptide sequence of IDP<sup>1</sup>  
284 could slightly alter the pH-induced phase transition from sphere to rod-like micelles.<sup>47</sup> Here,  
285 we studied how the phase transition depends on the hydrocarbon length. Using SAXS, we  
286 find that double-chained IDPA<sub>2×12</sub><sup>1</sup> shows worm-like micelles at low pH and spherical micelles  
287 at high pH. At intermediate pH, we detect a coexistence regime with the combination of two  
288 mesophases by fitting the SAXS scattering through a linear combination of spherical and  
289 cylindrical core-shell shape factors (Fig. 4, and Fig. S.14). These results point to a  
290 continuous coexistence transition between spherical and worm-like micelles of constant radii.  
291 Significantly, the sharpness of the transition depends on the length of the tails: longer tails  
292 result in a phase transition at higher pHs with a much broader range (2×16: pH 4.7-7.8,  
293 2×14: pH 4.7-7.5) between the two mesophases (Fig. 4). On the contrary, the IDPA<sub>2×12</sub><sup>1</sup>  
294 with shorter 2×12 tail transitions in a very narrow pH range (pH 5.7-6.0). Important to  
295 mention that for IDPA<sub>2×12</sub><sup>1</sup> the cylinders transition completely to spheres whereas IDPA<sub>2×14</sub><sup>1</sup>  
296 and IDPA<sub>2×14</sub><sup>1</sup> have still a low fraction of cylinders (approx. 2%) at high pHs.

297 Using single value decomposition (SVD, see material and methods), we tested how many  
298 distinct scattering patterns contribute to the polydisperse signal for the transition pH range  
299 described before. We assume that the number of independent vectors resulting from the  
300 SVD analysis represents an upper bound to the number of different phases in the coexisting  
301 regime. Indeed, our IDPA transition requires up to 2-3 coexisting scattering vectors for the  
302 different IDPAs. Specifically, for IDPAs with tail lengths of 2×12 and 2×16, there are up to  
303 three different phases, and for the IDPA<sub>2×14</sub><sup>1</sup>, only two different phases are required by the  
304 SVD analysis (Fig. Sup. S.10). This result also agrees well with our initial finding that the  
305 IDPA transitions from spheres to rods, and in-between, we have a linear superposition of the

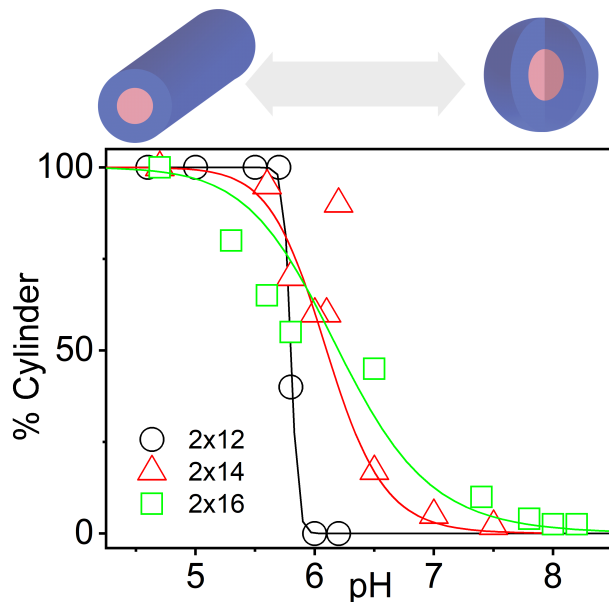

Figure 4: **pH-dependent phase transition for different lipid chain length.** The pH-dependent range of transition from worm-like (pH<4.7) to spherical micelles (pH>7.5) is broadening with increasing tail length (indicated in the legend). Phases in between are superposition of form factors and interpreted as coexistence. Lines represent a Hill function fit.

306 two dominant form factors. For IDPA<sub>2x12</sub><sup>1</sup> and IDPA<sub>2x16</sub><sup>1</sup>, we found that three independent  
307 vectors can describe the data. A possible explanation is an intermediate phase, e.g., an  
308 ellipsoidal phase, between the rod and the spherical phase that, unfortunately, is too weak  
309 for us to fit even by synchrotron's SAXS data.

310 The number of hydrocarbon chains is another architectural feature when designing ID-  
311 PAs. For double-chained IDPAs, the SAXS pattern is isotropic as the nanoparticles scatter  
312 of all possible orientations (Fig. 5a). However, while IDPAs with single hydrocarbon tails  
313 (IDPA<sub>1x14</sub><sup>1</sup>, IDPA<sub>1x16</sub><sup>1</sup> and IDPA<sub>1x18</sub><sup>1</sup>) show isotropic micellar spheres at intermediate and  
314 high pHs, they collapse into liquid crystals with a strong "spackle" pattern close to the  
315 pI. The scattering peak positions indicate Face Centered Cubic (FCC) and Body-Centered  
316 Cubic (BCC) Bravais lattices (Fig. 5b). Importantly, around the pI, the FCC and BCC  
317 organizations and "spackle" scatterings are evidence of soft IDPA monodispersed micelles  
318 packed into rather large "crystals" on the incoming beam dimensions ( $\approx 1.5 \text{ mm}^2$ ). The

319 SAXS analysis reveals that the lattice parameters for both FCC and BCC are proportional  
320 to hydrocarbon tail lengths ( $\ell$ , see Fig. 5c and d). Using  $\ell < \ell_{max} = (1.54 + 0.1265nm)$  as  
321 an approximation for hydrocarbon tail extension,<sup>17</sup> we can extract the approximate size of  
322 the hydrophilic domain thickness to be around  $2.7nm$ . The hydrophilic domain thickness  
323 does not depend on the hydrocarbon tail length. Moreover, the IDP layer at the isoelec-  
324 tric point is in agreement with the IDP layer of micellar spheres fitted at intermediate pH  
325 (Supplementary table S.1 and Fig. S.13 and dashed lines in Figs. 5 c,d).

326 After studying how the length and the number of tails affect the self-assembly of the  
327 IDPAs, we set to explore how minor alterations in the peptide sequence can tune the phase  
328 transition. For example, IDPA<sub>2×12</sub><sup>3</sup>, which is different from IPDA1 only by single amino acid  
329 at position 10, transitions at pH 5.4 from spherical to cylindrical micelles, while the equivalent  
330 IDPA<sub>2×12</sub><sup>1</sup> transitions at pH 5.8 (Supplementary Fig. S.15). The altered transition can be  
331 attributed to differences in interactions resulting from exchanging Histidine ( $pK_a = 6.0$ )  
332 with the neutral glycine. An alternative route to influence the self-assembly is through the  
333 introduction of salt (NaCl), which screen the electrostatic interactions between neighboring  
334 charged peptides. Using Kratky analysis on the SAXS data, we reveal the compactness of the  
335 IDPAs at varying salt concentrations (Supplementary Fig. S.11). We find a trend towards  
336 higher slopes in the high momentum vector ( $q$ ) region with increasing salt concentration.  
337 This is more pronounced with increasing chain length. The high slope indicates that the  
338 IDPAs are more unfolded than at low salt concentrations. For the low  $q$ -region, the dispersity  
339 between the curves becomes more pronounced with increasing chain length.

## 340 **Cleavable IDPAs**

341 One of the advantages of IDPAs is the ability to design sequences that can interact with  
342 other biological entities. For example, the utilization of IDP as the hydrophilic domain can be  
343 designed to interact with an enzyme, in order to induce drug release from the self-assembled  
344 nano-carrier or aggregation of the carrier at the site of enzymatic activation.<sup>58,59</sup> Therefore,

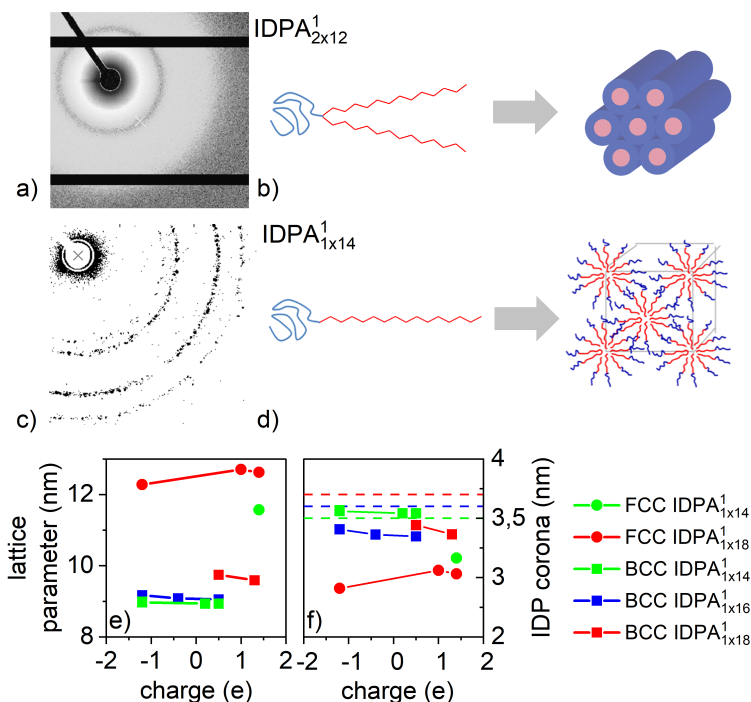

Figure 5: **Formation of liquid crystals at isoelectric point (pH 4.3) for single tailed IDPAs with different tail lengths.** 2D SAXS pattern for (a) double and single (c) tailed IDPAs at isoelectric point (pH 4) showing hexagonal and FCC phases. (b) and (d) are related cartoons illustrating the formation of mesophases from the double and single tailed IDPAs, respectively. Lattice parameters (d) for (e) BCC and (f) FCC phases from integrated 1D patterns for single tailed IDPAs near isoelectric point were found by extracting peak position via gaussian fit. The charge is calculated via summation of amino acids' charges at various pHs. Unit cell dimensions are directly-measured from SAXS correlation peak positions. Nearest neighbours (dashed lines) are extracted using  $d\sqrt{2}/2$  for FCC and  $d$  for BCC. IDP headgroup layer sizes for IDPA<sub>1x14</sub><sup>1</sup>, IDPA<sub>1x16</sub><sup>1</sup> and IDPA<sub>1x18</sub><sup>1</sup> are extracted by subtracting the calculated tail length ( $\ell_{max}$ , see text) from the lattice parameter.

345 we designed the additional IDPA sequence (IDPA<sub>2x12</sub><sup>4</sup>, Supplementary Fig. S.1) that contains  
 346 a cleavage domain (GPLGLAG) for an MMP-9 enzyme. Indeed, upon incubation with the  
 347 MMP-9 enzyme, the IDPA is cleaved with a shortened peptide sequence (Supplementary  
 348 Fig. S.2). We term the remaining amphiphile, which includes the hydrophobic domain, as  
 349 IDPA<sub>2x12</sub><sup>4Δ</sup> and the cleaved peptide as IDP<sup>4δ</sup>.

350 The cleavage site in IDPA<sub>2x12</sub><sup>4</sup> was introduced to disturb the self-assembled structure  
 351 via enzymatic reaction dramatically. The sequence conjugated to the hydrocarbon (IDP<sup>4Δ</sup>)  
 352 contains neutral amino acids. It is on the threshold of being disordered, while the remaining

353 part (after the cleavage site), termed here IDP<sup>4δ</sup>, contains partially protonatable amino acids  
354 and is expected to be disordered at all pHs (Supplementary Fig. S.7, S.8). Both, IDPA<sub>2×12</sub><sup>4</sup>  
355 and IDPA<sub>2×12</sub><sup>4Δ</sup>, were measured at various pHs, and their self-assembly was studied using  
356 SAXS.

357 At physiological pH, IDPA<sub>2×12</sub><sup>4</sup> assembles into spherical micelles, indicated through the  
358 scattering intensity at small angles, <sup>60</sup>  $I(q \rightarrow 0) \sim q^{-0}$ , while IDPA<sub>2×12</sub><sup>4Δ</sup> is forming worm-like  
359 micelles with  $I(q \rightarrow 0) \sim q^{-1}$  (Fig 6 a). We further fit the SAXS data using a (smooth)  
360 spherical core-shell model and a cylindrical core-shell model and found that the hydrocarbon  
361 domain stays constant while the peptide layer of the sphere is smearing toward higher radii  
362 with lower electron densities (Fig 6b).

363 At different pH values, IDPA<sub>2×12</sub><sup>4</sup> undergoes structural phase transitions while IDPA<sub>2×12</sub><sup>4Δ</sup>  
364 remains in a worm-like state (Supplementary Fig. S.16). In agreement with Takahashi et  
365 al.,<sup>61</sup> the SAXS pattern for IDPA<sub>2×12</sub><sup>4</sup> at pH 5 indicates the formation of polymer vesicles  
366 upon stretching of spherical micelles.

367 Furthermore, this pH sensitivity was investigated by measuring the  $R_g$  versus the pH of  
368 the crude peptides using SAXS. The  $R_g$ s for IDP<sup>4</sup> and IDP<sup>4Δ</sup> show little dependence on pH  
369 and are  $\sim 9$  and  $\sim 11\text{\AA}$ , respectively. However, we assume that the  $R_g$  of IDP<sup>4</sup> is more  
370 sensitive to pH (Fig. S.17). This is indicative of the pH-sensitive phase change of IDPA<sub>2×12</sub><sup>4</sup>  
371 compared to IDPA<sub>2×12</sub><sup>4Δ</sup>.

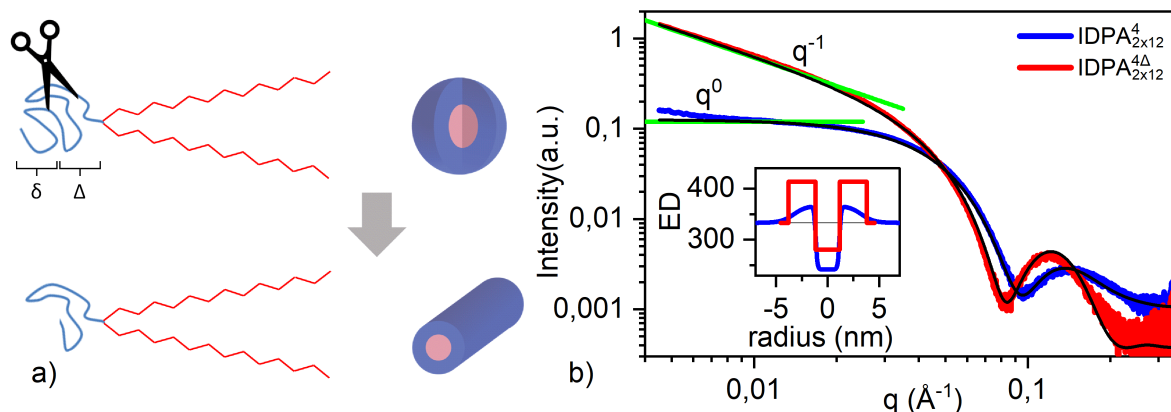

Figure 6: **SAXS data for cleavable IDPA.** a) Cartoon showing self-assembly of spherical and worm-like micelles for IDPA<sub>2x12</sub><sup>4</sup> and IDPA<sub>2x12</sub><sup>4Δ</sup>, respectively. b) SAXS data and fit for the IDPAs (blue IDPA<sub>2x12</sub><sup>4</sup>, red IDPA<sub>2x12</sub><sup>4Δ</sup>) at physiological pH (pH 7). Inset shows electron density (ED) profiles. Green lines show small angle region fits used for initial structural determination.

## Discussion

372

373 IDPAs present a highly modular molecular platform for the design of transformative nanocarriers.<sup>47</sup> We presented new IDPA molecules, which were entirely synthesized by an automated  
374 solid phase peptide synthesizer. A peptide sequence inspired by the disordered regions of  
375 neurofilament light chain protein was systematically altered to study how the interplay of  
376 hydrophobic tail(s) architecture and polypeptide headgroup conformation dictates the self-  
377 assembly process.  
378

379 Despite sharing identical amino acids, IDPA<sub>2x12</sub><sup>1</sup> and IDPA<sub>2x12</sub><sup>2</sup>, with similar hydropho-  
380 bic domains, assemble into spherical micelles with different radii at high pH. Specifically,  
381 IDPA<sub>2x12</sub><sup>1</sup> assembly has a significantly larger polypeptide shell thickness than IDPA<sub>2x12</sub><sup>2</sup>.  
382 This demonstrates how to sequence ordering plays a dominant role in the assembly of ID-  
383 PAs. In IDPA<sub>2x12</sub><sup>2</sup>, we segregated the positive and negative charged amino acids at the edges  
384 of the sequence. Therefore, the more compact peptide conformation is likely to result from  
385 transient back folding of the peptide chains due to electrostatic interactions of the oppositely  
386 charged ends (Fig. 2b).

387 Investigation of the self-assembly of the two IDPAs at different pH values revealed that

388 the transition from a collapsed hexagonal phase at the isoelectric point to dispersed worm-like  
389 micelles is also sequence-dependent. For example, IDPA<sub>2×12</sub><sup>2</sup> transitions to a dispersed state  
390 over a relatively broad pH range compared to IDPA<sub>2×12</sub><sup>1</sup>. Considering our previous results,<sup>47</sup>  
391 we argue that the transient hairpin-shaped and more compact peptide conformation are less-  
392 prone to interact with neighboring worm-like micelles. In a sense, for IDPA<sub>2×12</sub><sup>2</sup>, the almost  
393 complete overlap between the peptides of opposing worm-like micelles is needed to induce  
394 electrostatic attraction, while for IDPA<sub>2×12</sub><sup>1</sup>, only partial overlap is needed.

395 In addition, even a minor alteration, such as the exchange of a single amino acid in the  
396 peptide sequence, can tune the pH structural phase transition. Specifically, IDPA<sub>2×12</sub><sup>3</sup> transi-  
397 tions between spheres to elongated worm-like micelles at pH 5.4, while IDPA<sub>2×12</sub><sup>1</sup> transitions  
398 at pH 5.8 with a change of one single amino acid (histidine to glycine). When calculating the  
399 net charge difference between IDPA<sub>2×12</sub><sup>1</sup> and IDPA<sub>2×12</sub><sup>3</sup>, one can expect that the phase transi-  
400 tion will occur at pH 5.2 (Supplementary Fig. S.15a), although experimentally, the difference  
401 is milder. Using a free energy model for electrostatic repulsion contribution, we can explain  
402 this phenomenon.<sup>47</sup> In short, the position of the charged amino acid along the polypeptide  
403 contributes to the electrostatic repulsion between the neighboring chains in proportion to  
404 their vicinity to the peptide-tail interface. Therefore, exchanging the charged histidine in  
405 the middle of the sequence has a relatively mild impact on the mesoscopic structural phase  
406 transition.

407 As an alternative means to alter the structural phase transition, we evaluated the role of  
408 the hydrophobic tail(s) domain. When introducing IDPAs with just one chain instead of two,  
409 the IDPAs self-assembled into large spherical micelles crystals close to the isoelectric point.  
410 As shown in Fig. 5, the distance between these micelles within the crystals is significantly  
411 smaller than the micelles radii at slightly higher pHs. This indicates that the outer IDPs'  
412 shells overlap between nearest neighbors. Such overlap is needed to induce short-ranged  
413 attractive forces between neighboring IDPAs, stabilizing the micellar crystals.

414 At intermediate pHs, the IDPAs are in the coexistence phase of spheres and cylinders,

415 where the transition width broadens with increasing tail length. While similar coexistence  
416 of rod and micellar phases, instead of elongated micelles with end caps, has been shown  
417 before,<sup>62</sup> the correlation between the transition width and the chain length requires further  
418 explanation, as detailed below.

419 It was proposed that the reason for the coexistence between cylindrical micelles of finite  
420 lengths and spherical micelles is an energy barrier the system has to overcome on the way  
421 of transformation between the two types of micelle.<sup>62</sup> This energy barrier originates from  
422 the difference between the energy of two endcaps of a cylindrical micelle and the energy of  
423 a spherical micelle. Hence, such coexistence does not represent a thermodynamic equilib-  
424 rium between the two phases but rather indicates a slow transition between the two phases  
425 enabling simultaneous observation of both cylindrical and spherical micelles within the time  
426 scale of the experiments. In this model, the beginning of the coexistence region (Fig. 4)  
427 corresponds to conditions upon which the energy barrier of formation of a spherical micelle  
428 out of a cylindrical one is such that the characteristic time of this event is comparable with  
429 the time of observation. At the end of the coexistence region, the energy barrier must be  
430 small enough to make the transition time shorter than the observation time. The origin of  
431 the energy barrier is an energetically unfavorable but unavoidable transition region, which  
432 builds up within a cylindrical micelle between its endcap and the cylindrical part because  
433 of a difference in their cross-sectional thicknesses.<sup>62</sup> This difference results from packing  
434 molecules with a particular molecular volume and surface area into a spherical versus cylin-  
435 drical aggregate. An increase in the spontaneous monolayer curvature driven by the charge  
436 growth at increasing pH makes the endcap more energetically favorable and hence decreases  
437 the energy barrier. A simple geometrical consideration explains that the shorter the IDPA  
438 chain length, the more minor the thickness mismatch between the endcap and the cylindrical  
439 part of a micelle and, therefore, the lower the initial energy barrier. As a result, less charge  
440 must be generated to cut down this energy barrier and facilitate a fast cylinder-to-sphere  
441 transition. This explains the chain length dependence of the width of the coexistence region



442 (Fig. 4).

443 We have shown that IDPAs can be engineered to induce phase transitions upon enzy-  
444 matic activation. IDPA $_{2 \times 12}^4$  self-assembles into spherical micelles, whereas upon enzymatic  
445 cleavage, the assembly of the cleaved IDPA $_{2 \times 12}^{4\Delta}$  transforms into worm-like micelles at phys-  
446 iological pH. Furthermore, we demonstrated that pH triggers phase transitions for the un-  
447 cleaved peptide containing protonable amino acids, whereas pH does not affect the cleaved  
448 peptide containing only neutral amino acids. These results are of great interest for biomed-  
449 ical applications, given the ability to change the physical properties of the nanocarrier at  
450 constant pH by an enzymatic reaction. It thus suggests an alternative path for enzymati-  
451 cally triggered activation of drug release in a controllable manner. Furthermore, IDPA $_{2 \times 12}^4$ ,  
452 in similarity to all other IDPAs presented here, shows remarkably controllable, monodisperse  
453 nano-structures. The pH dependency of IDPA $_{2 \times 12}^4$  and IDPA $_{2 \times 12}^{4\Delta}$  self-assembly demonstrates  
454 the ability to design both pH-dependent and independent structures upon cleavage. Thus,  
455 our work enables us to combine enzymatic cleavage with pH-dependent phase transition in  
456 a single amphiphilic molecule.

## 457 Conclusion

458 We have studied the self-assembly of five disordered polypeptide domains conjugated with dif-  
459 ferent fatty acids in IDPAs. Even though polypeptide chain conformation is disordered, the  
460 interactions between the peptide headgroups lead to various distinct self-assembled nanos-  
461 tructures. The IDPA systems respond to pH and salinity and exhibit structural phase tran-  
462 sitions depending on the peptide sequence and the number and length of the hydrocarbon  
463 tail.

464 It stands to reason that IDPAs mesostructures such as micelles, micellar tubes, or con-  
465 densed phases and their defined structural transitions could potentially be exploited in  
466 biotechnological applications or as drug delivery nanomaterial in biological environments.

467 In this context, it is notable that pH-dependent phase transitions are sensitive to single  
468 amino acid mutations within the sequence. The width of the structural phase transition can  
469 be tuned by choosing hydrocarbon tails.

470 Furthermore, it is remarkable that permutations in the amino acid sequence led to dif-  
471 ferent average conformations, e.g., extended or transient hairpin-like back folding. Thus,  
472 disordered peptide motifs can result in distinctly different average conformations dependent  
473 on amino acid composition and sequence order. Last, we designed an enzymatically cleav-  
474 able IDPA to demonstrate that IDPAs as surface-active components of nanocarriers can  
475 potentially react to metabolic conditions at target sites.

476 IDP based headgroups may serve as grafted polymers for stabilizing particles via shell-  
477 formation, as alternative to polyethylene glycol (PEG)-lipids. Overall, their highly modular  
478 structure and function make IDPAs valuable to implement tailored functionalities and fine-  
479 tuned interactions for controllable structural phase transitions that could expedite cargo  
480 release. Based on our results and the discussed advantageous properties, we expect that  
481 IDPA conjugates will be valuable resources for the research community advancing precision  
482 medicine.

483 **Supporting Information** Chemical formulas, disorder analysis, FRET data, SAXS  
484 data and details about SAXS analysis

## 485 **Acknowledgement**

486 The synchrotron SAXS data was collected at beamline P12 operated by EMBL Hamburg  
487 at the PETRA III storage ring (DESY, Hamburg, Germany), and the SOLEIL synchrotron  
488 facility for time on Beamline SWING and at beamline B21 at Diamond Light Source. We  
489 would like to thank Haydyn Mertens (DESY), Thomas Bizien (Soleil), Nathan Cowieson and  
490 Charlotte Edwards-Gayle (Diamond Light Source) for the assistance in using the beamlines.  
491 This work was supported by the National Science Foundation under Grant No. 1715627,  
492 the United States-Israel Bi-national Science Foundation under Grant No. 2020787, and  
493 the Israel Science Foundation under Grants No. 1454/20. We also acknowledge fruitful  
494 discussions with Vladimir Uversky, Ram Avinery and Uri Raviv.

## 495 **Supporting Information**

496 This file contains:

- 497 • Chemical structures (Fig. S1) and tables with key parameters for fitting
- 498 • Figures S2-S12 referred in the main text
- 499 • Form factor equations for SAXS, including figures Sx referred here

## 500 References

- 501 (1) Kwon, G. S.; Forrest, M. L. Amphiphilic block copolymer micelles for nanoscale drug  
502 delivery. *Drug development research* **2006**, *67*, 15–22.
- 503 (2) Steinbuck, M. P.; Seenappa, L. M.; Jakubowski, A.; McNeil, L. K.; Haqq, C. M.;  
504 DeMuth, P. C. A lymph node–targeted Amphiphile vaccine induces potent cellular and  
505 humoral immunity to SARS-CoV-2. *Science Advances* **2021**, *7*, eabe5819.
- 506 (3) Srinivas, R.; Samanta, S.; Chaudhuri, A. Cationic amphiphiles: promising carriers of  
507 genetic materials in gene therapy. *Chemical Society Reviews* **2009**, *38*, 3326–3338.
- 508 (4) Semple, S. C.; Akinc, A.; Chen, J.; Sandhu, A. P.; Mui, B. L.; Cho, C. K.; Sah, D. W.;  
509 Stebbing, D.; Crosley, E. J.; Yaworski, E., et al. Rational design of cationic lipids for  
510 siRNA delivery. *Nature biotechnology* **2010**, *28*, 172–176.
- 511 (5) Kulkarni, J. A.; Myhre, J. L.; Chen, S.; Tam, Y. Y. C.; Danescu, A.; Richman, J. M.;  
512 Cullis, P. R. Design of lipid nanoparticles for in vitro and in vivo delivery of plasmid  
513 DNA. *Nanomedicine: Nanotechnology, Biology and Medicine* **2017**, *13*, 1377–1387.
- 514 (6) Jyotsana, N.; Sharma, A.; Chaturvedi, A.; Budida, R.; Scherr, M.; Kuchenbauer, F.;  
515 Lindner, R.; Noyan, F.; Sühs, K.-W.; Stangel, M., et al. Lipid nanoparticle-mediated  
516 siRNA delivery for safe targeting of human CML in vivo. *Annals of hematology* **2019**,  
517 *98*, 1905–1918.
- 518 (7) Barba, A. A.; Bochicchio, S.; Dalmoro, A.; Lamberti, G. Lipid delivery systems  
519 for nucleic-acid-based-drugs: From production to clinical applications. *Pharmaceutics*  
520 **2019**, *11*, 360.
- 521 (8) Peer, D.; Lieberman, J. Special delivery: targeted therapy with small RNAs. *Gene*  
522 *therapy* **2011**, *18*, 1127–1133.

- 523 (9) Rosenblum, D.; Joshi, N.; Tao, W.; Karp, J. M.; Peer, D. Progress and challenges  
524 towards targeted delivery of cancer therapeutics. *Nature communications* **2018**, *9*, 1–  
525 12.
- 526 (10) Rosenbaum, I.; Harnoy, A. J.; Tirosch, E.; Buzhor, M.; Segal, M.; Frid, L.; Shahara-  
527 bani, R.; Avinery, R.; Beck, R.; Amir, R. J. Encapsulation and covalent binding of  
528 molecular payload in enzymatically activated micellar nanocarriers. *Journal of the*  
529 *American Chemical Society* **2015**, *137*, 2276–2284.
- 530 (11) Segal, M.; Ozery, L.; Slor, G.; Wagle, S. S.; Ehm, T.; Beck, R.; Amir, R. J. Architec-  
531 tural Change of the Shell-Forming Block from Linear to V-Shaped Accelerates Micel-  
532 lar Disassembly, but Slows the Complete Enzymatic Degradation of the Amphiphiles.  
533 *Biomacromolecules* **2020**, *21*, 4076–4086.
- 534 (12) Mane, S. R.; Sathyan, A.; Shunmugam, R. Biomedical applications of pH-responsive  
535 amphiphilic polymer nanoassemblies. *ACS Applied Nano Materials* **2020**, *3*, 2104–2117.
- 536 (13) Hong, L.; Zhang, Z.; Zhang, Y.; Zhang, W. Synthesis and self-assembly of stimuli-  
537 responsive amphiphilic block copolymers based on polyhedral oligomeric silsesquioxane.  
538 *Journal of Polymer Science Part A: Polymer Chemistry* **2014**, *52*, 2669–2683.
- 539 (14) Meng, Q.; Kou, Y.; Ma, X.; Liang, Y.; Guo, L.; Ni, C.; Liu, K. Tunable self-assembled  
540 peptide amphiphile nanostructures. *Langmuir* **2012**, *28*, 5017–5022.
- 541 (15) Ganta, S.; Devalapally, H.; Shahiwala, A.; Amiji, M. A review of stimuli-responsive  
542 nanocarriers for drug and gene delivery. *Journal of controlled release* **2008**, *126*, 187–  
543 204.
- 544 (16) York, A. W.; Kirkland, S. E.; McCormick, C. L. Advances in the synthesis of am-  
545 phiphilic block copolymers via RAFT polymerization: stimuli-responsive drug and gene  
546 delivery. *Advanced drug delivery reviews* **2008**, *60*, 1018–1036.

- 547 (17) Israelachvili, J. N.; Mitchell, D. J.; Ninham, B. W. Theory of self-assembly of lipid  
548 bilayers and vesicles. *Biochimica et Biophysica Acta (BBA)-Biomembranes* **1977**, *470*,  
549 185–201.
- 550 (18) Hamley, I. Self-assembly of amphiphilic peptides. *Soft Matter* **2011**, *7*, 4122–4138.
- 551 (19) Cui, H.; Webber, M. J.; Stupp, S. I. Self-assembly of peptide amphiphiles: From  
552 molecules to nanostructures to biomaterials. *Peptide Science: Original Research on*  
553 *Biomolecules* **2010**, *94*, 1–18.
- 554 (20) Hendricks, M. P.; Sato, K.; Palmer, L. C.; Stupp, S. I. Supramolecular assembly of  
555 peptide amphiphiles. *Accounts of chemical research* **2017**, *50*, 2440–2448.
- 556 (21) Fleming, S.; Ulijn, R. V. Design of nanostructures based on aromatic peptide am-  
557 phiphiles. *Chemical Society Reviews* **2014**, *43*, 8150–8177.
- 558 (22) Webber, M. J.; Tongers, J.; Renault, M.-A.; Roncalli, J. G.; Losordo, D. W.; Stupp, S. I.  
559 Development of bioactive peptide amphiphiles for therapeutic cell delivery. *Acta bio-*  
560 *materialia* **2010**, *6*, 3–11.
- 561 (23) Mata, A.; Palmer, L.; Tejada-Montes, E.; Stupp, S. I. *Nanotechnology in regenera-*  
562 *tive medicine. Design of biomolecules for nanoengineered biomaterials for regenerative*  
563 *medicine*; Springer, 2012; pp 39–49.
- 564 (24) Hartgerink, J. D.; Beniash, E.; Stupp, S. I. Peptide-amphiphile nanofibers: a versatile  
565 scaffold for the preparation of self-assembling materials. *Proceedings of the National*  
566 *Academy of Sciences* **2002**, *99*, 5133–5138.
- 567 (25) Li, N.; Li, N.; Yi, Q.; Luo, K.; Guo, C.; Pan, D.; Gu, Z. Amphiphilic peptide dendritic  
568 copolymer-doxorubicin nanoscale conjugate self-assembled to enzyme-responsive anti-  
569 cancer agent. *Biomaterials* **2014**, *35*, 9529–9545.

- 570 (26) Shi, Y.; Hu, Y.; Ochbaum, G.; Lin, R.; Bitton, R.; Cui, H.; Azevedo, H. S. Enzymatic  
571 activation of cell-penetrating peptides in self-assembled nanostructures triggers fibre-  
572 to-micelle morphological transition. *Chemical communications* **2017**, *53*, 7037–7040.
- 573 (27) Wright, P. E.; Dyson, H. J. Intrinsically unstructured proteins: re-assessing the protein  
574 structure-function paradigm. *Journal of molecular biology* **1999**, *293*, 321–331.
- 575 (28) Wei, M.-T.; Elbaum-Garfinkle, S.; Holehouse, A. S.; Chen, C. C.-H.; Feric, M.;  
576 Arnold, C. B.; Priestley, R. D.; Pappu, R. V.; Brangwynne, C. P. Phase behaviour of  
577 disordered proteins underlying low density and high permeability of liquid organelles.  
578 *Nature Chemistry* **2017**, *9*, 1118.
- 579 (29) Ehm, T.; Shinar, H.; Meir, S.; Sekhon, A.; Sethi, V.; Morgan, I. L.; Rahamim, G.;  
580 Saleh, O. A.; Beck, R. Intrinsically disordered proteins at the nano-scale. *Nano Futures*  
581 **2021**, *5*, 22501.
- 582 (30) Habchi, J.; Tompa, P.; Longhi, S.; Uversky, V. N. Introducing protein intrinsic disorder.  
583 *Chemical reviews* **2014**, *114*, 6561–6588.
- 584 (31) Uversky, V. N. Intrinsically disordered proteins from A to Z. *The international journal*  
585 *of biochemistry & cell biology* **2011**, *43*, 1090–1103.
- 586 (32) Riback, J. A.; Zhu, L.; Ferrolino, M. C.; Tolbert, M.; Mitrea, D. M.; Sanders, D. W.;  
587 Wei, M.-T.; Kriwacki, R. W.; Brangwynne, C. P. Composition-dependent thermody-  
588 namics of intracellular phase separation. *Nature* **2020**, *581*, 209–214.
- 589 (33) Milles, S.; Lemke, E. A. Single molecule study of the intrinsically disordered FG-repeat  
590 nucleoporin 153. *Biophysical Journal* **2011**, *101*, 1710–1719.
- 591 (34) Lemke, E. A. The multiple faces of disordered nucleoporins. *Journal of molecular biology*  
592 **2016**, *428*, 2011–2024.



- 593 (35) Laser-Azogui, A.; Kornreich, M.; Malka-Gibor, E.; Beck, R. Neurofilament assembly  
594 and function during neuronal development. *Current opinion in cell biology* **2015**, *32*,  
595 92–101.
- 596 (36) Kornreich, M.; Malka-Gibor, E.; Zuker, B.; Laser-Azogui, A.; Beck, R. Neurofilaments  
597 function as shock absorbers: compression response arising from disordered proteins.  
598 *Physical review letters* **2016**, *117*, 148101.
- 599 (37) Kornreich, M.; Malka-Gibor, E.; Laser-Azogui, A.; Doron, O.; Herrmann, H.; Beck, R.  
600 Composite bottlebrush mechanics:  $\alpha$ -internexin fine-tunes neurofilament network prop-  
601 erties. *Soft Matter* **2015**, *11*, 5839–5849.
- 602 (38) Block, J.; Witt, H.; Candelli, A.; Peterman, E. J.; Wuite, G. J.; Janshoff, A.; Köster, S.  
603 Nonlinear loading-rate-dependent force response of individual vimentin intermediate  
604 filaments to applied strain. *Physical review letters* **2017**, *118*, 048101.
- 605 (39) Köster, S.; Weitz, D. A.; Goldman, R. D.; Aebi, U.; Herrmann, H. Intermediate filament  
606 mechanics in vitro and in the cell: from coiled coils to filaments, fibers and networks.  
607 *Current opinion in cell biology* **2015**, *32*, 82–91.
- 608 (40) Forsting, J.; Kraxner, J.; Witt, H.; Janshoff, A.; Köster, S. Vimentin intermediate fila-  
609 ments undergo irreversible conformational changes during cyclic loading. *Nano letters*  
610 **2019**, *19*, 7349–7356.
- 611 (41) Das, R. K.; Ruff, K. M.; Pappu, R. V. Relating sequence encoded information to form  
612 and function of intrinsically disordered proteins. *Current opinion in structural biology*  
613 **2015**, *32*, 102–112.
- 614 (42) Theillet, F.-X.; Kalmar, L.; Tompa, P.; Han, K.-H.; Selenko, P.; Dunker, A. K.; Daugh-  
615 drill, G. W.; Uversky, V. N. The alphabet of intrinsic disorder: I. Act like a Pro: On the  
616 abundance and roles of proline residues in intrinsically disordered proteins. *Intrinsically*  
617 *Disordered Proteins* **2013**, *1*, e24360.

- 618 (43) Vovk, A.; Zilman, A. Effects of sequence composition and patterning on the structure  
619 and dynamics of intrinsically disordered proteins, manuscript submitted to bioRxiv-  
620 biophysics section: June 2020, <https://doi.org/10.1101/2020.06.08.137752> (accessed  
621 31/08/2022).
- 622 (44) Zheng, W.; Best, R. B. An extended Guinier analysis for intrinsically disordered pro-  
623 teins. *Journal of molecular biology* **2018**, *430*, 2540–2553.
- 624 (45) Das, R. K.; Pappu, R. V. Conformations of intrinsically disordered proteins are influ-  
625 enced by linear sequence distributions of oppositely charged residues. *Proceedings of*  
626 *the National Academy of Sciences* **2013**, *110*, 13392–13397.
- 627 (46) Beck, R.; Deek, J.; Jones, J. B.; Safinya, C. R. Gel-expanded to gel-condensed transition  
628 in neurofilament networks revealed by direct force measurements. *Nature materials*  
629 **2010**, *9*, 40–46.
- 630 (47) Jacoby, G.; Segal Asher, M.; Ehm, T.; Abutbul Ionita, I.; Shinar, H.; Azoulay-  
631 Ginsburg, S.; Zemach, I.; Koren, G.; Danino, D.; Kozlov, M. M., et al. Order from  
632 disorder with intrinsically disordered peptide amphiphiles. *Journal of the American*  
633 *Chemical Society* **2021**, *143*, 11879–11888.
- 634 (48) Vincenzi, M.; Accardo, A.; Costantini, S.; Scala, S.; Portella, L.; Trotta, A.; Ronga, L.;  
635 Guillon, J.; Leone, M.; Colonna, G., et al. Intrinsically disordered amphiphilic peptides  
636 as potential targets in drug delivery vehicles. *Molecular BioSystems* **2015**, *11*, 2925–  
637 2932.
- 638 (49) Accardo, A.; Leone, M.; Tesauro, D.; Aufiero, R.; Bénarouche, A.; Cavalier, J.-F.;  
639 Longhi, S.; Carriere, F.; Rossi, F. Solution conformational features and interfacial  
640 properties of an intrinsically disordered peptide coupled to alkyl chains: a new class of  
641 peptide amphiphiles. *Molecular BioSystems* **2013**, *9*, 1401–1410.

- 642 (50) Mészáros, B.; Erdős, G.; Dosztányi, Z. IUPred2A: context-dependent prediction of  
643 protein disorder as a function of redox state and protein binding. *Nucleic acids research*  
644 **2018**, *46*, W329–W337.
- 645 (51) Klausen, M. S.; Jespersen, M. C.; Nielsen, H.; Jensen, K. K.; Jurtz, V. I.; Soen-  
646 derby, C. K.; Sommer, M. O. A.; Winther, O.; Nielsen, M.; Petersen, B., et al. NetSurfP-  
647 2.0: Improved prediction of protein structural features by integrated deep learning.  
648 *Proteins: Structure, Function, and Bioinformatics* **2019**, *87*, 520–527.
- 649 (52) Acar, H.; Samaeekia, R.; Schnorenberg, M. R.; Sasmal, D. K.; Huang, J.; Tirrell, M. V.;  
650 LaBelle, J. L. Cathepsin-mediated cleavage of peptides from peptide amphiphiles leads  
651 to enhanced intracellular peptide accumulation. *Bioconjugate chemistry* **2017**, *28*,  
652 2316–2326.
- 653 (53) Black, M.; Trent, A.; Kostenko, Y.; Lee, J. S.; Olive, C.; Tirrell, M. Self-assembled  
654 peptide amphiphile micelles containing a cytotoxic T-Cell epitope promote a protective  
655 immune response in vivo. *Advanced Materials* **2012**, *24*, 3845–3849.
- 656 (54) Malka-Gibor, E.; Kornreich, M.; Laser-Azogui, A.; Doron, O.; Zingerman-Koladko, I.;  
657 Harapin, J.; Medalia, O.; Beck, R. Phosphorylation-induced mechanical regulation of  
658 intrinsically disordered neurofilament proteins. *Biophysical journal* **2017**, *112*, 892–900.
- 659 (55) Manalastas-Cantos, K.; Konarev, P. V.; Hajizadeh, N. R.; Kikhney, A. G.;  
660 Petoukhov, M. V.; Molodenskiy, D. S.; Panjkovich, A.; Mertens, H. D.; Gruzinov, A.;  
661 Borges, C., et al. ATSAS 3.0: expanded functionality and new tools for small-angle  
662 scattering data analysis. *Journal of Applied Crystallography* **2021**, *54*, 343–355.
- 663 (56) Luft, J. R.; Wolfley, J. R.; Snell, E. H. What’s in a drop? Correlating observations  
664 and outcomes to guide macromolecular crystallization experiments. *Crystal growth &*  
665 *design* **2011**, *11*, 651–663.

- 666 (57) Gilliland, G. L. A biological macromolecule crystallization database: a basis for a crys-  
667 tallization strategy. *Journal of crystal growth* **1988**, *90*, 51–59.
- 668 (58) Nguyen, M. M.; Carlini, A. S.; Chien, M.-P.; Sonnenberg, S.; Luo, C.; Braden, R. L.;  
669 Osborn, K. G.; Li, Y.; Gianneschi, N. C.; Christman, K. L. Enzyme-responsive nanopar-  
670 ticles for targeted accumulation and prolonged retention in heart tissue after myocardial  
671 infarction. *Advanced materials* **2015**, *27*, 5547–5552.
- 672 (59) Battistella, C.; Callmann, C. E.; Thompson, M. P.; Yao, S.; Yeldandi, A. V.;  
673 Hayashi, T.; Carson, D. A.; Gianneschi, N. C. Delivery of Immunotherapeutic Nanopar-  
674 ticles to Tumors via Enzyme-Directed Assembly. *Advanced Healthcare Materials* **2019**,  
675 *8*, 1901105.
- 676 (60) Guinier, A.; Fournet, G.; Yudowitch, K. L. *Small-angle scattering of X-rays*; Wiley  
677 New York, 1955; p 24.
- 678 (61) Takahashi, R.; Narayanan, T.; Yusa, S.-i.; Sato, T. Formation Kinetics of Polymer  
679 Vesicles from Spherical and Cylindrical Micelles Bearing the Polyelectrolyte Complex  
680 Core Studied by Time-Resolved USAXS and SAXS. *Macromolecules* **2022**, 684–695.
- 681 (62) Majhi, P. R.; Dubin, P. L.; Feng, X.; Guo, X.; Leermakers, F.; Tribet, C. Coexistence  
682 of spheres and rods in micellar solution of dodecyldimethylamine oxide. *The Journal of*  
683 *Physical Chemistry B* **2004**, *108*, 5980–5988.
- 684 (63) Ben-Nun, T.; Ginsburg, A.; Székely, P.; Raviv, U. X+: a comprehensive computation-  
685 ally accelerated structure analysis tool for solution X-ray scattering from supramolec-  
686 ular self-assemblies. *Journal of Applied Crystallography* **2010**, *43*, 1522–1531.
- 687 (64) Van Der Lee, R.; Buljan, M.; Lang, B.; Weatheritt, R. J.; Daughdrill, G. W.;  
688 Dunker, A. K.; Fuxreiter, M.; Gough, J.; Gsponer, J.; Jones, D. T., et al. Classifi-  
689 cation of intrinsically disordered regions and proteins. *Chemical reviews* **2014**, *114*,  
690 6589–6631.

- 691 (65) Asor, R.; Schlicksup, C. J.; Zhao, Z.; Zlotnick, A.; Raviv, U. Rapidly forming early  
692 intermediate structures dictate the pathway of capsid assembly. *Journal of the American*  
693 *Chemical Society* **2020**, *142*, 7868–7882.
